# Supplementary material for: Cationic CNC-stabilized Pickering emulsions of linseed oil for hydrophobic coatings
Source: Royal Society of Chemistry journal article supplement (doi:10.1039/d3ra01412f), 2023-01-01
Supplement: d3ra01412f1.pdf [file d3ra01412f1.pdf]

Supplementary Information for

Cationic CNC-stabilized Pickering emulsions of linseed oil for hydrophobic coatings

Esther E. Jaekel,<sup>\*a</sup> and Svitlana Filonenko<sup>a</sup>

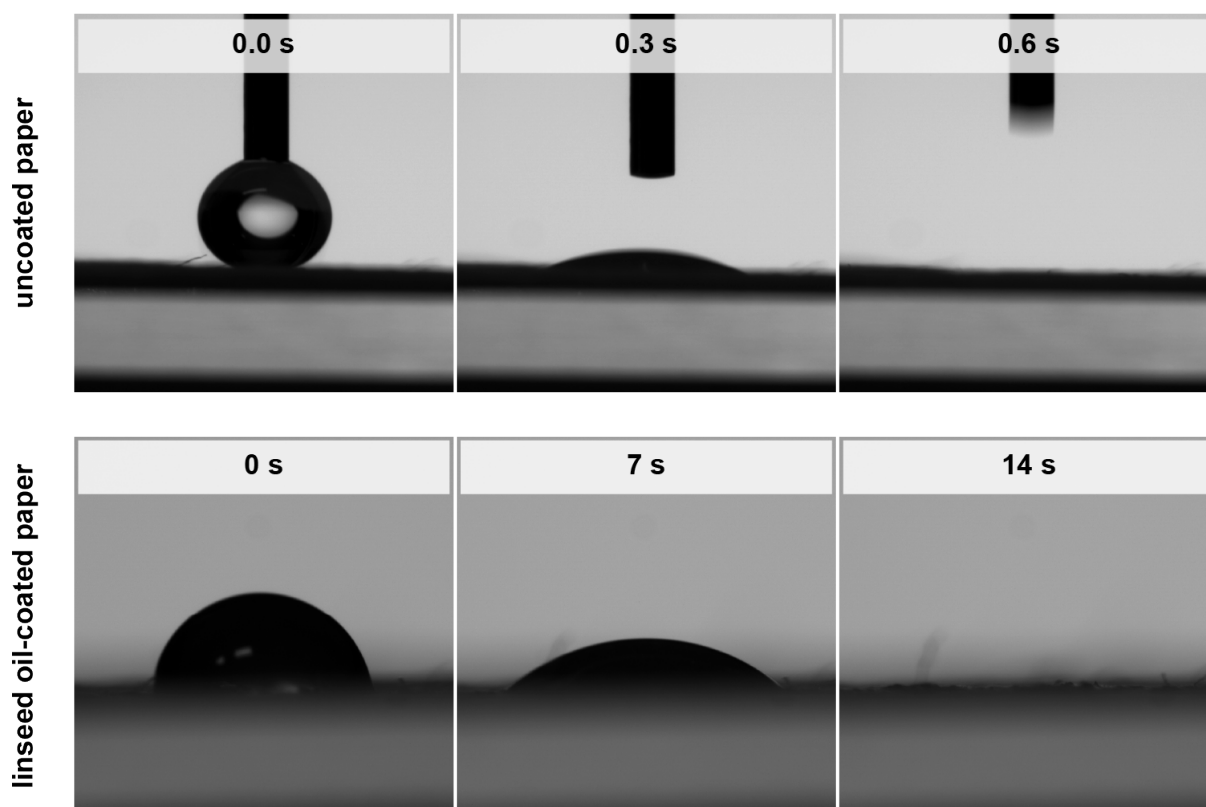

**Figure S1:** Photographs of sessile drop experiment on uncoated filter paper and filter paper soaked in only linseed oil.

<sup>a</sup> Am Mühlenberg 1, 14476, Potsdam, Germany. Tel: +49 331 567-9559; E-mail: [esther.jaekel@mpikg.mpg.de](mailto:esther.jaekel@mpikg.mpg.de)

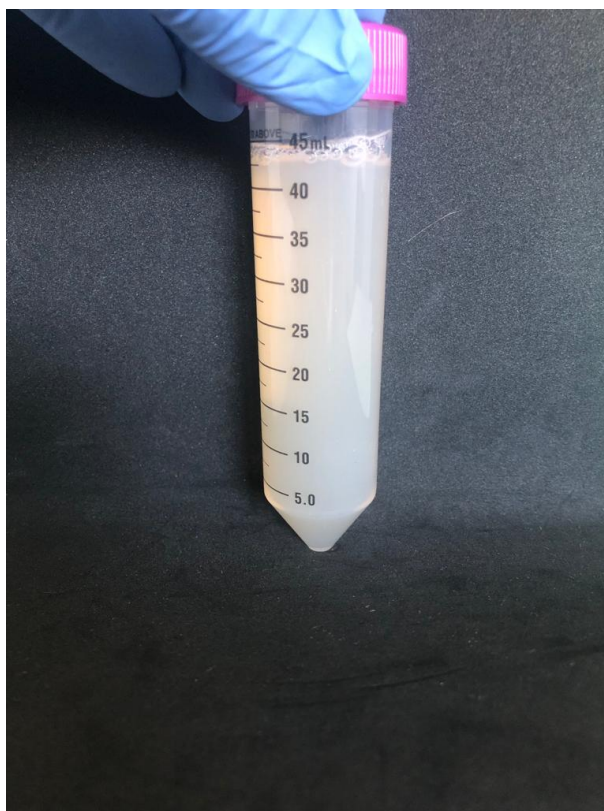

**Figure S2:** Photograph of CL4 after three months shows no sign of phase separation.
